# Supplementary material for: 11-Mercaptoundecanoic acid capped gold nanoclusters as a fluorescent probe for specific detection of folic acid via a ratiometric fluorescence strategy
Source: Royal Society of Chemistry journal article supplement (doi:10.1039/c8ra00481a), 2018-01-01
Supplement: c8ra00481a1.pdf [file c8ra00481a1.pdf]

## Supplementary Information for

11-Mercaptoundecanoic acid capped gold nanoclusters as a  
fluorescence probe for specific detection of folic acid *via*  
ratiometric fluorescence strategy

Lei Meng<sup>a,b</sup>, Jian-Hang Yin<sup>a</sup>, Yaqing Yuan<sup>a</sup>, , Na Xu<sup>a\*</sup>

<sup>a</sup>*College of Materials Science and Engineering, Jilin Institute of Chemical Technology, Jilin  
132022, China.*

<sup>b</sup>*College of Science, Jilin Institute of Chemical Technology, Jilin 132022, China.*

\*E-mail: [xn\\_1216@163.com](mailto:xn_1216@163.com) (Na Xu)

## Figures and caption

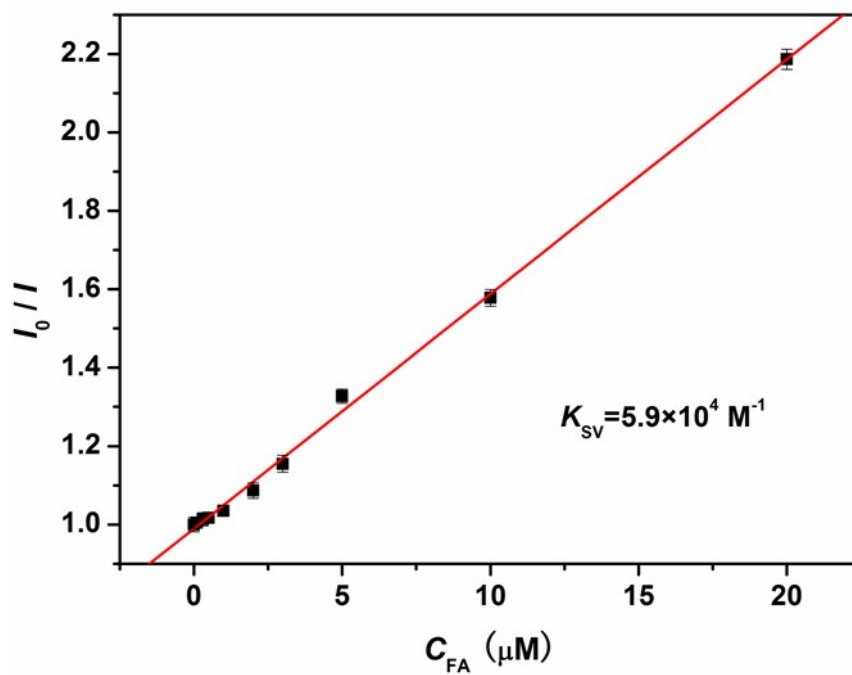

**Fig.S1** Stern–Volmer plot of fluorescence quenching, where the  $I_0$  and  $I$  represents fluorescence intensity of the AuNCs@MUA in absence and presence of FA, respectively. Inset is quenching constant ( $K_{sv}$ ) obtained from Stern–Volmer equation.

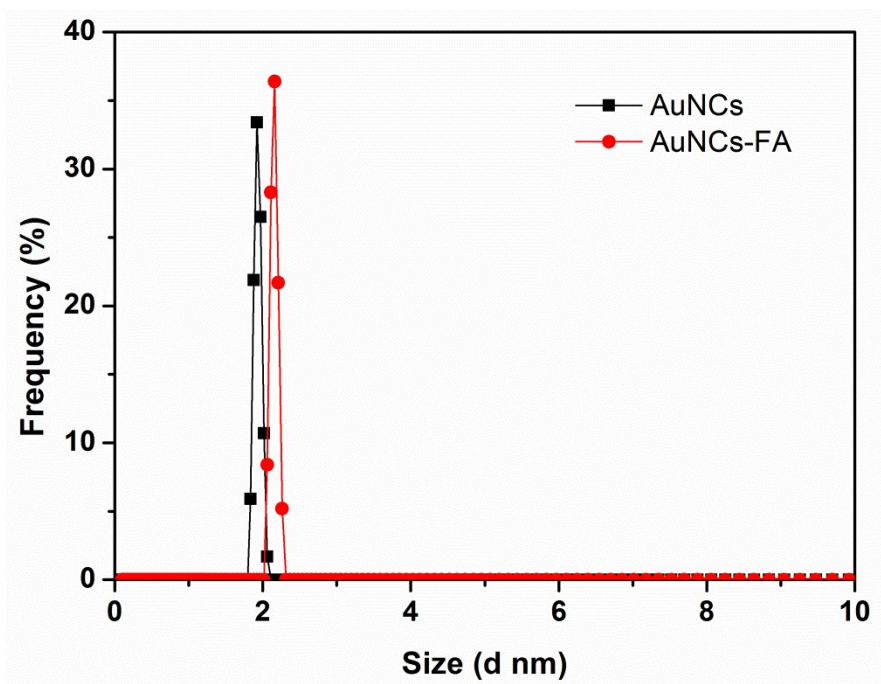

**Fig.S2** Size distributions of AuNCs@MUA in absence and presence of FA

**Table S1.** Research papers available up to now concerning different fluorescence probes for detection of FA

| Ref.      | materials     | Linear range      | LOD         | response strategy                 |
|-----------|---------------|-------------------|-------------|-----------------------------------|
| S1        | CdTe QDs@MIPs | 0-20 $\mu$ M      | 31.1 nM     | Turn-off ( $I_{536}$ )            |
| S2        | Carbon QDs    | 0-30 $\mu$ M      | 0.5 nM      | Turn-off ( $I_{440}$ )            |
| S3        | LDHs          | 1-200 $\mu$ M     | 100 nM      | Turn-off ( $I_{506}$ )            |
| S4        | CdS QDs       | 0.72 $\mu$ M      | --          | Turn-off ( $I_{505}$ )            |
| S5        | ZnSe QDs      | 0-250 $\mu$ M     | 7 nM        | Turn-on ( $I_{480}$ )             |
|           | ZnSe@ZnS QDs  | 0-250 $\mu$ M     | 5 nM        | Turn-on ( $I_{490}$ )             |
| S6        | PVA- CdTe QDs | --                | 42.29 ng/mL | ratiometric ( $I_{442}/I_{363}$ ) |
| S7        | AuNCs@BSA     | --                | 18.3 ng/mL  | Turn-off ( $I_{629}$ )            |
| S8        | AuNPs & AuNCs | 0.11-2.27 $\mu$ M | 290 nM      | Turn-off ( $I_{625}$ )            |
| This work | AuNCs@MUA     | 0-20 $\mu$ M      | 26 nM       | ratiometric ( $I_{446}/I_{436}$ ) |

## References in ESI

[S1] A.A. Ensafi, P. Nasr-Esfahani, B. Rezaei, Simultaneous detection of folic acid and methotrexate by an optical sensor based on molecularly imprinted polymers on dual-color CdTe quantum dots, *Analytica Chimica Acta*, 996 (2017) 64-73.

[S2] M. Wang, Y. Jiao, C. Cheng, J. Hua, Y. Yang, Nitrogen-doped carbon quantum dots as a fluorescence probe combined with magnetic solid-phase extraction purification for analysis of folic acid in human serum, *Analytical and Bioanalytical Chemistry*, 409 (2017) 7063-7075.

[S3] P. Liu, D. Liu, Y. Liu, L. Li, ANTS-anchored Zn-Al-CO<sub>3</sub>-LDH particles as fluorescent probe for sensing of folic acid, *Journal of Solid State Chemistry*, 241 (2016) 164-172.

[S4] S. Kundu, S. Maiti, T.K. Das, D. Ghosh, C.N. Roy, A. Saha, Exploiting the biomimetic and luminescence properties of multivalent dendrimer-semiconductor nanohybrid materials in the ultra-low level determination of folic acid, *Analyst*, 142 (2017) 2491-2499.

[S5] I.A. Mir, K. Rawat, P.R. Solanki, H.B. Bohidar, ZnSe core and ZnSe@ZnS core-shell quantum dots as platform for folic acid sensing, *Journal of Nanoparticle Research*, 19 (2017) 260.

[S6] S. Chakravarty, P. Dutta, S. Kalita, N. Sen Sarma, PVA-based nanobiosensor for ultrasensitive detection of folic acid by fluorescence quenching, *Sensors and Actuators B: Chemical*, 232 (2016) 243-250.

[S7] B. Hemmateenejad, F. Shakerizadeh-shirazi, F. Samari, BSA-modified gold

nanoclusters for sensing of folic acid, *Sensors and Actuators B: Chemical*, 199 (2014) 42-46.

[S8] X. Yan, H. Li, B. Cao, Z. Ding, X. Su, A highly sensitive dual-readout assay based on gold nanoclusters for folic acid detection, *Microchimica Acta*, 182 (2015) 1281-1288.
